# Supplementary material
Source: publisher figshare collection journal article supplement (https://acs.figshare.com/ndownloader/files/3811681)
Supplement: Supplementary file 1 [file 3811681]

## Biodegradable and pH-Responsive Nanoparticles Designed for Site-Specific Delivery in Agriculture

Megan R. Hill,<sup>†</sup> Elliot J. Mackrell,<sup>†</sup> Carl P. Forsthoefel,<sup>†</sup> Shaun P. Jensen,<sup>‡</sup> Mingsheng Chen,<sup>†, §</sup> Gloria Moore,<sup>‡</sup> Zhenli L. He,<sup>§</sup> Brent S. Sumerlin<sup>\*†</sup>

<sup>†</sup>George & Josephine Butler Polymer Research Laboratory, Center for Macromolecular Science and Engineering, Department of Chemistry, University of Florida, P.O. Box 117200, Gainesville, Florida, 32611, United States

<sup>‡</sup>Horticultural Sciences Department, University of Florida, P.O. Box 110690, Gainesville, Florida, 32611, United States

<sup>§</sup>Institute of Food and Agricultural Sciences, University of Florida, 2199 South Rock Road, Fort Pierce, Florida 34945, United States

Email: [sumerlin@chem.ufl.edu](mailto:sumerlin@chem.ufl.edu)

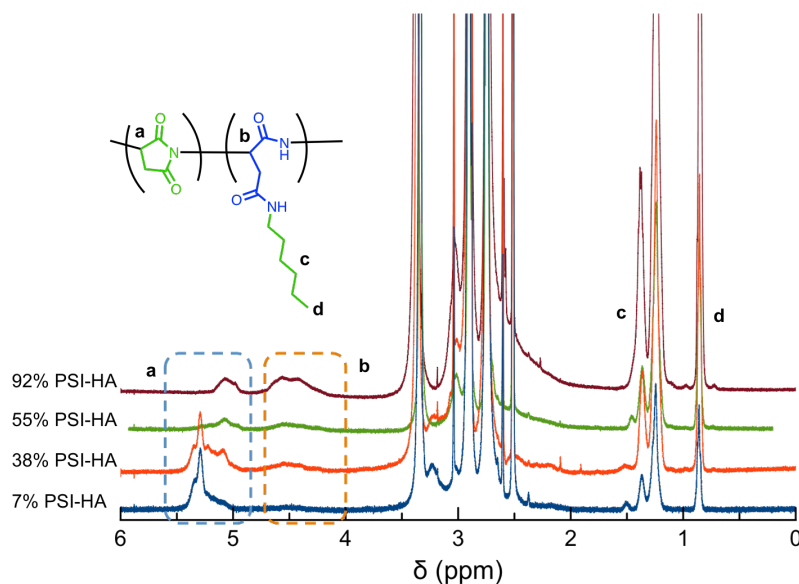

**Figure S1.** <sup>1</sup>H NMR spectra of PSI-HA copolymers with functionalization 7-92%.

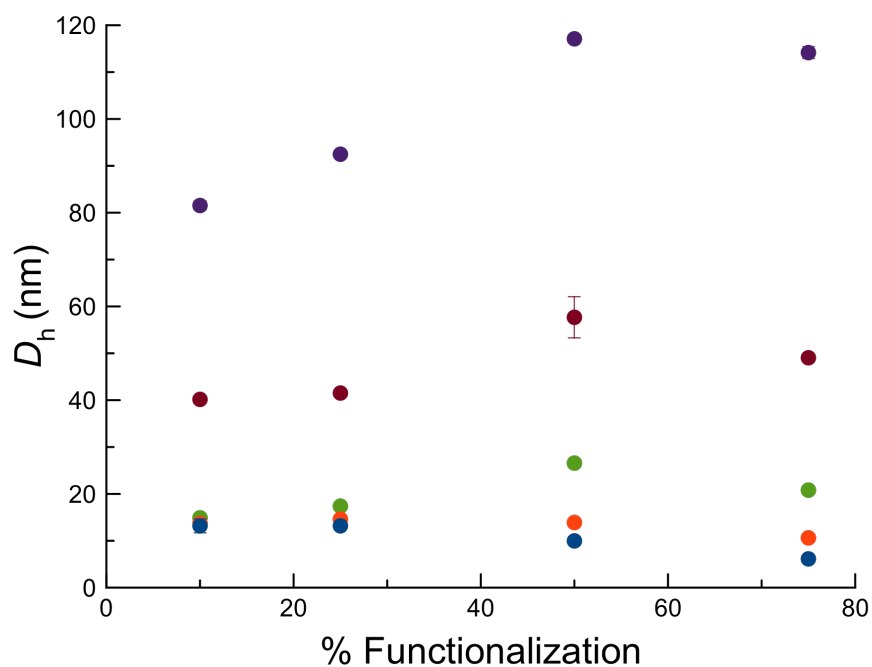

**Figure S2.** Hydrodynamic diameter ( $D_h$  (nm)) as determined by DLS of PSI-nanoparticles versus percent functionalization with HA for nanoparticles precipitated at different concentrations (• 100 mg/mL, • 50 mg/mL, • 20 mg/mL, • 10 mg/mL, and • 5 mg/mL).

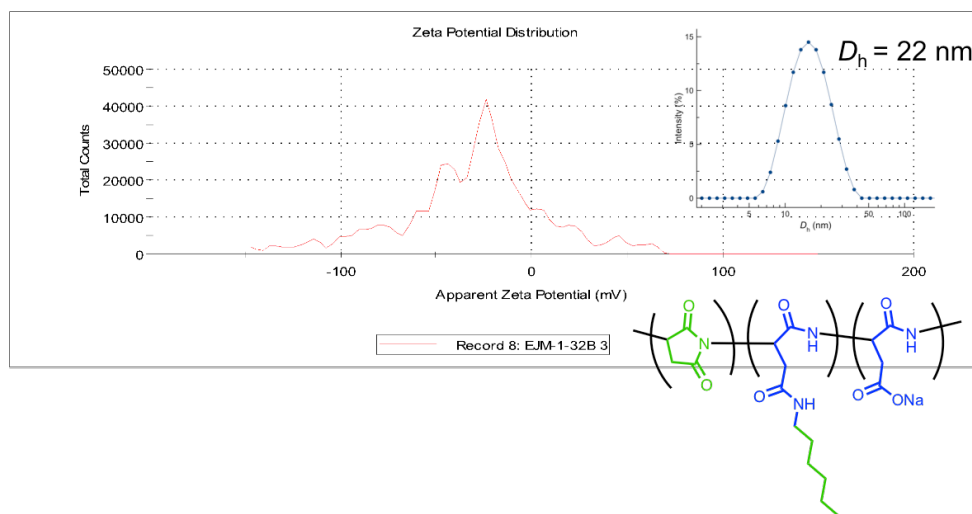

**Figure S3.** Zeta potential and DLS size distribution for 15% PSI-HA with 1% hydrolysis

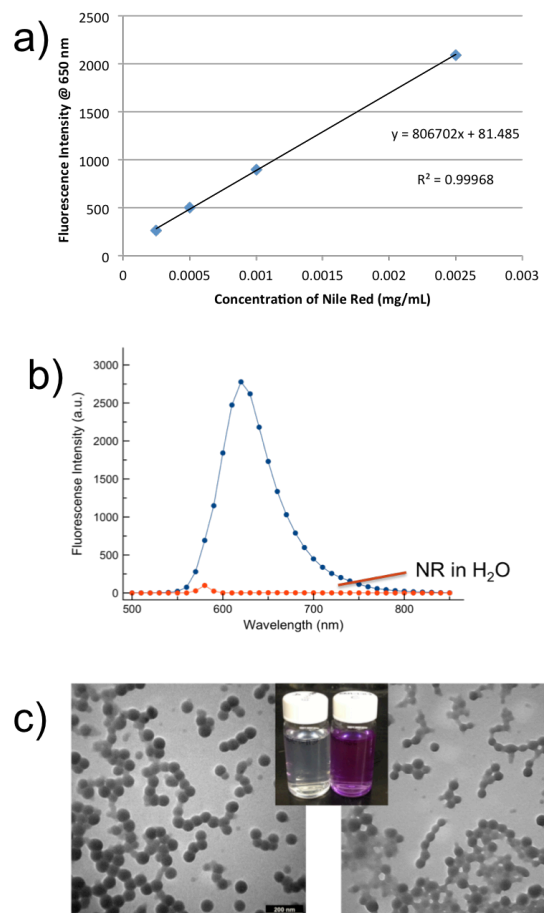

**Figure S4.** (a) Fluorescence calibration of Nile Red in DMF with  $\lambda_{\text{excitation}} = 530 \text{ nm}$  and  $\lambda_{\text{emission}} = 650 \text{ nm}$ , (b) Fluorescence intensity of loaded 1% PSI-HA nanoparticles compared to Nile red in water and, (c) TEM images of 50% PSI-HA nanoparticles before Nile red loading (left, clear), and after loading (right, pink).

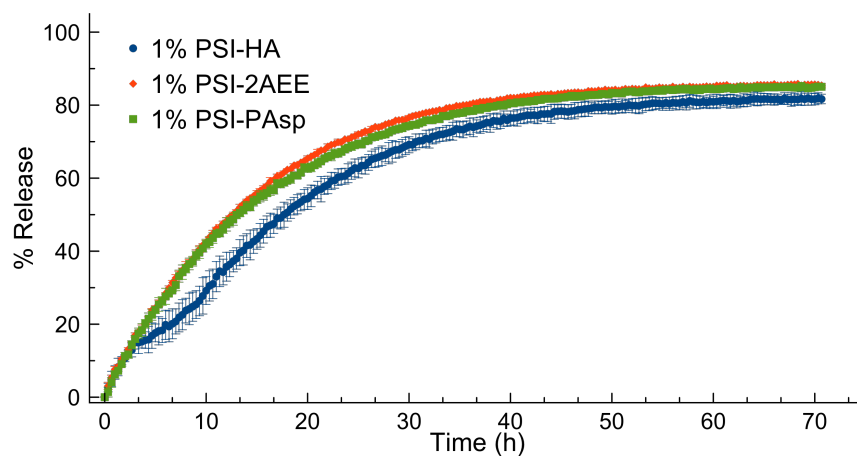

**Figure S5.** Release of Nile Red with varying functionalizing moieties (1% functionalization PSI-HA, PSI-2AEE, and PSI-PAsp)

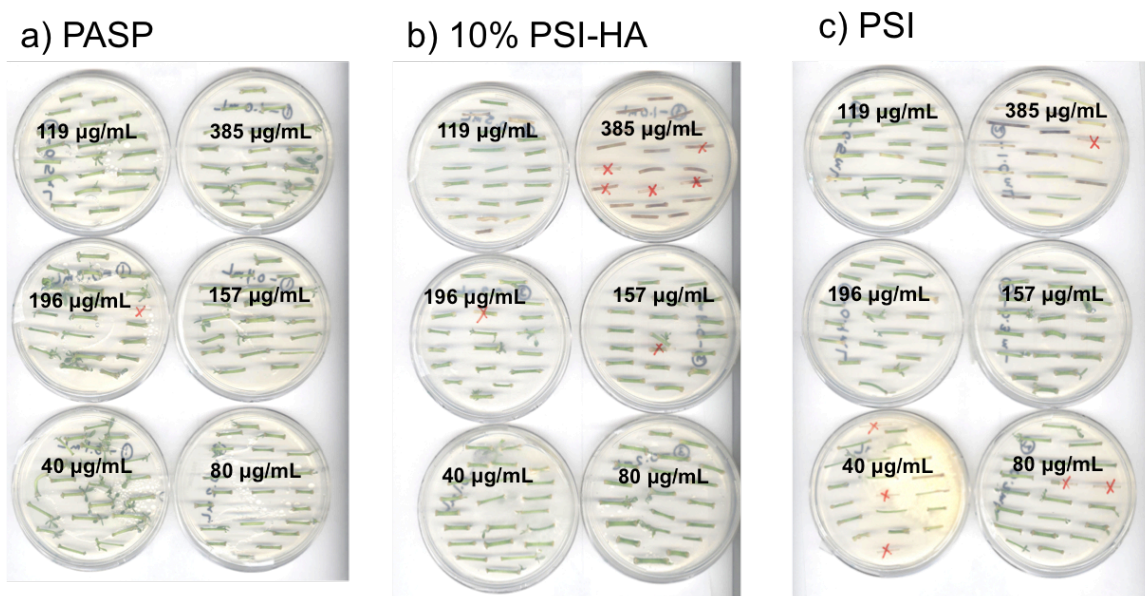

**Figure S6.** Plant tissue toxicity study of various polymer concentrations after 21 days of (a) PASP, (b) 10% PSI-HA, and (c) PSI
